# Supplementary material for: Individualized versus Standardized Risk Assessment in Patients at High Risk for Adverse Drug Reactions (The IDrug Randomized Controlled Trial)–Never Change a Running System?
Source: MDPI journal article supplement (doi:10.3390/ph14101056), 2021-10-18
Supplement: s1 [file s1]

**Table S1.** Reasons for dropping out of the intention to treat cohort ( $N = 340$ ).

| Parameter                                  | Total population, $N = 340$ | Individualized risk<br>assessment group, $n = 167$ | Standardized risk<br>assessment group, $n = 173$ |
|--------------------------------------------|-----------------------------|----------------------------------------------------|--------------------------------------------------|
| Per protocol (PP) cohort, $n$ (%)          | 273 (80.3)                  | 134 (80.2)                                         | 139 (80.3)                                       |
| Drop out of ITT, $n$ (%)                   | 67 (19.7)                   | 33 (19.8)                                          | 34 (19.7)                                        |
| Patients with bleeding event, $n$ (%)      | 182 (53.5)                  | 91 (54.5)                                          | 91 (52.6)                                        |
| Administrational reasons*, $n$ (%)         | 26 (7.6)                    | 11 (6.6)                                           | 15 (8.7)                                         |
| Not appearing for the study visit, $n$ (%) | 19 (5.6)                    | 11 (6.6)                                           | 8 (4.6)                                          |
| Consent withdrawn, $n$ (%)                 | 11 (3.2)                    | 4 (2.4)                                            | 7 (4.1)                                          |
| Reason unknown, $n$ (%)                    | 11 (3.2)                    | 7 (4.2)                                            | 4 (2.3)                                          |

ITT: intention to treat; \*administrational reasons in practice office: e.g., visit conducted at wrong time point, practice office closed during follow-up.

**Table S2.** Characteristics of the total per protocol population ( $N = 273$ ) and stratified according to individualized and standardized risk assessment group.

| Parameter                          | Missing, $n$ (%) | Total population, $N = 273$ | Individualized risk<br>assessment group, $n = 134$ | Standardized risk<br>assessment group, $n = 139$ | $p$ -value   |
|------------------------------------|------------------|-----------------------------|----------------------------------------------------|--------------------------------------------------|--------------|
| Age (years), median (IQR)          | -                | 75 (70; 80)                 | 75 (70; 78)                                        | 76 (71; 81)                                      | <b>0.030</b> |
| Sex (male), $n$ (%)                | -                | 262 (59.3)                  | 79 (59.0)                                          | 83 (59.7)                                        | 0.899        |
| Number of drugs, median (IQR)      | -                | 14 (9; 19)                  | 14 (8; 19)                                         | 14 (9; 20)                                       | 0.629        |
| HAS BLED (score), median (IQR)     | -                | 2 (1; 3)                    | 2 (1; 3)                                           | 2 (1; 3)                                         | 0.916        |
| CHA2DS2 VASc (score), median (IQR) | -                | 4 (3; 5)                    | 4 (3; 5)                                           | 4 (3; 5)                                         | 0.537        |
| SF-36 score, median (IQR)          |                  |                             |                                                    |                                                  |              |
| Vitality                           | 3 (1.1)          | 65 (50; 76)                 | 70 (50; 78)                                        | 60 (45; 78)                                      | 0.124        |
| Physical functioning               | 3 (1.1)          | 80 (60; 90)                 | 85 (65; 95)                                        | 69 (55; 90)                                      | <b>0.002</b> |
| Bodily pain                        | 3 (1.1)          | 84 (52; 100)                | 84 (57; 100)                                       | 80 (52; 100)                                     | 0.500        |
| General health perception          | 3 (1.1)          | 67 (52; 77)                 | 67 (56; 77)                                        | 62 (50; 77)                                      | 0.257        |
| Physical role functioning          | 3 (1.1)          | 100 (50; 100)               | 100 (50; 100)                                      | 100 (50; 100)                                    | 0.205        |
| Emotional role functioning         | 3 (1.1)          | 100 (100; 100)              | 100 (100; 100)                                     | 100 (100; 100)                                   | 0.908        |
| Social role functioning            | 3 (1.1)          | 100 (100; 100)              | 100 (100; 100)                                     | 100 (94; 100)                                    | 0.283        |
| Mental health                      | 3 (1.1)          | 84 (72; 92)                 | 88 (76; 92)                                        | 84 (72; 92)                                      | 0.595        |
| Time in study (days), median (IQR) | -                | 280 (272; 303)              | 284 (273; 306)                                     | 279 (269; 301)                                   | 0.050        |
| GFR (mL/min/1.73m <sup>2</sup> )   | 3 (1.1)          | 67.2 (52.5; 82.7)           | 68.2 (52.9; 83.5)                                  | 66.0 (49.9; 81.4)                                | 0.212        |
| Renal function, $n$ (%)            | 3 (1.1)          |                             |                                                    |                                                  | 0.281        |
| GFR $\geq 90$                      |                  | 26 (9.6)                    | 12 (9.1)                                           | 14 (10.1)                                        |              |
| GFR 60- < 90                       |                  | 148 (54.8)                  | 75 (56.8)                                          | 73 (52.9)                                        |              |
| GFR 30- < 60                       |                  | 91 (33.7)                   | 45 (34.1)                                          | 46 (33.3)                                        |              |
| GFR 15- < 30                       |                  | 4 (1.5)                     | 0 (0)                                              | 4 (2.9)                                          |              |

|                                                   |          |            |            |            |       |
|---------------------------------------------------|----------|------------|------------|------------|-------|
| GFR < 15                                          |          | 1 (0.4)    | 0 (0)      | 1 (0.7)    |       |
| Highest educational degree, <i>n</i> (%)          | 15 (5.5) |            |            |            | 0.949 |
| Major school diploma                              |          | 142 (55.0) | 72 (56.3)  | 70 (53.8)  |       |
| Secondary school diploma                          |          | 49 (19.0)  | 24 (18.8)  | 25 (19.2)  |       |
| Technical college diploma                         |          | 15 (5.8)   | 7 (5.5)    | 8 (6.2)    |       |
| High school diploma                               |          | 17 (6.6)   | 8 (6.3)    | 9 (6.9)    |       |
| College degree                                    |          | 34 (13.2)  | 17 (13.3)  | 17 (13.1)  |       |
| No diploma                                        |          | 1 (0.4)    | 0 (0)      | 1 (0.8)    |       |
| Number of antithrombotic drugs used, median (IQR) | -        | 1 (1; 1)   | 1 (1; 1)   | 1 (1; 1)   | 0.972 |
| Antithrombotic drug use, <i>n</i> (%)             |          |            |            |            |       |
| VKA                                               | -        | 167 (61.2) | 80 (59.7)  | 87 (62.6)  | 0.624 |
| DOAC                                              |          | 77 (28.2)  | 37 (27.6)  | 40 (28.8)  | 0.831 |
| ASA                                               |          | 16 (5.9)   | 8 (6.0)    | 8 (5.8)    | 0.940 |
| P2Y <sub>12</sub> -inhibitor                      |          | 46 (16.8)  | 26 (19.4)  | 20 (14.4)  | 0.268 |
| PPI use, <i>n</i> (%)                             | -        | 139 (50.9) | 63 (47.0)  | 76 (54.7)  | 0.206 |
| Statin use, <i>n</i> (%)                          | -        | 153 (56.0) | 75 (56.0)  | 78 (56.1)  | 0.981 |
| CYP2C19 phenotype, <i>n</i> (%)                   | -        |            |            |            | 0.771 |
| NM                                                |          | 192 (70.3) | 96 (71.6)  | 76 (69.1)  |       |
| IM                                                |          | 72 (26.4)  | 33 (24.6)  | 39 (28.1)  |       |
| PM                                                |          | 9 (3.3)    | 5 (3.7)    | 4 (2.9)    |       |
| CYP2C9 phenotype, <i>n</i> (%)                    | -        |            |            |            | 0.517 |
| NM                                                |          | 182 (66.7) | 85 (63.4)  | 97 (69.8)  |       |
| IM                                                |          | 85 (31.5)  | 46 (34.3)  | 40 (28.8)  |       |
| PM                                                |          | 5 (1.8)    | 3 (2.2)    | 2 (1.4)    |       |
| VKORC1 phenotype, <i>n</i> (%)                    | -        |            |            |            | 0.941 |
| Normal                                            |          | 240 (87.9) | 118 (88.1) | 122 (87.8) |       |
| Poor                                              |          | 33 (12.1)  | 16 (11.9)  | 17 (12.2)  |       |

IQR: interquartile range, GFR: glomerular filtration rate, VKA: vitamin-K-antagonist, DOAC: directly acting oral anticoagulants, ASA: acetylsalicylic acid, CKD: chronic kidney disease. Significant findings in bold text.

**Table S3.** Unadjusted risk and frequencies of the composite primary study endpoint (any bleeding event, any thromboembolic event, or death) (*N* = 273).

| Endpoint                                   | Total population, <i>N</i> = 273 | Individualized risk assessment group, <i>n</i> = 134 | Standardized risk assessment group, <i>n</i> = 139 | OR [95% CI]      | <i>p</i> -value |
|--------------------------------------------|----------------------------------|------------------------------------------------------|----------------------------------------------------|------------------|-----------------|
| Composite endpoint, <i>n</i> (%)           | 161 (59.0)                       | 81 (60.4)                                            | 80 (57.6)                                          | 1.13 [0.70–1.83] |                 |
| Death, <i>n</i> (%)                        | 8 (2.9)                          | 2 (1.5)                                              | 6 (4.3)                                            | 0.34 [0.07–1.69] |                 |
| Patients with bleeding event, <i>n</i> (%) | 151 (55.3)                       | 73 (54.5)                                            | 78 (56.1)                                          | 0.94 [0.58–1.51] |                 |
| Number of bleeding events, mean (SD)       | 0.73 (0.77)                      | 0.70 (0.77)                                          | 0.75 (0.78)                                        |                  | 0.618           |

|                                                  |             |             |             |                   |       |
|--------------------------------------------------|-------------|-------------|-------------|-------------------|-------|
| Skin or mucosal bleeding, <i>n</i> (%)           | 131 (48.0)  | 60 (44.8)   | 71 (51.1)   | 0.78 [0.48–1.25]  |       |
| Hematochezia                                     | 15 (5.5)    | 10 (7.5)    | 5 (3.6)     | 2.16 [0.72–6.50]  |       |
| Hematuria                                        | 27 (9.9)    | 11 (8.2)    | 16 (11.5)   | 0.69 [0.31–1.54]  |       |
| Muscle or intra-articular bleeding, <i>n</i> (%) | 5 (1.8)     | 2 (1.5)     | 3 (2.2)     | 0.69 [0.11–4.18]  |       |
| Intra-cranial bleeding, <i>n</i> (%)             | 1 (0.4)     | 1 (0.7)     | 0 (0)       | -                 | 0.308 |
| Intra-ocular bleeding, <i>n</i> (%)              | 8 (2.9)     | 4 (3.0)     | 4 (2.9)     | 1.04 [0.25–4.24]  |       |
| Other bleeding, <i>n</i> (%)                     | 11 (4.0)    | 6 (4.5)     | 5 (3.6)     | 1.26 [0.37–4.22]  |       |
| Patients with thromboembolic event, <i>n</i> (%) | 21 (7.7)    | 13 (9.7)    | 8 (5.8)     | 1.76 [0.71–4.39]  |       |
| Number of thromboembolic events, mean (SD)       | 0.08 (0.32) | 0.11 (0.38) | 0.06 (0.23) |                   | 0.155 |
| Superficial venous thrombosis, <i>n</i> (%)      | 2 (0.7)     | 2 (1.5)     | 0 (0)       |                   | 0.148 |
| Deep venous thrombosis, <i>n</i> (%)             | 1 (0.4)     | 1 (0.7)     | 0 (0)       | -                 | 0.308 |
| Pulmonary embolism, <i>n</i> (%)                 | 1 (0.4)     | 0 (0)       | 1 (0.7)     | -                 | 0.325 |
| Stroke/TIA, <i>n</i> (%)                         | 3 (1.1)     | 3 (2.2)     | 0 (0)       | -                 | 0.076 |
| Myocardial infarction, <i>n</i> (%)              | 2 (0.7)     | 1 (0.7)     | 1 (0.7)     | 1.04 [0.06–16.76] |       |
| Other thromboembolic event, <i>n</i> (%)         | 12 (4.4)    | 6 (4.5)     | 6 (4.3)     |                   |       |

SD: standard deviation, TIA: transient ischemic attack. Significant findings in bold text.

**Table S4.** Adjusted odds ratios for the individualized risk assessment group compared with the standardized risk assessment group for study endpoints in the per protocol cohort (*N* = 273).

| Endpoint             | OR [95% CI] Model 1 | OR [95% CI] Model 2 | OR [95% CI] Model 3 |
|----------------------|---------------------|---------------------|---------------------|
| Composite endpoint   | 1.31 [0.78–2.19]    | 1.35 [0.79–2.28]    | 1.35 [0.79–2.30]    |
| Death                | 0.46 [0.04–4.66]    | 0.14 [0.01–3.70] *  | 0.10 [0.00–2.82]*   |
| Bleeding event       | 1.11 [0.67–1.86]    | 1.14 [0.67–1.92]    | 1.13 [0.67–1.93]    |
| Thromboembolic event | 1.84 [0.69–4.87]    | 1.92 [0.69–5.33]    | 1.84 [0.66–5.16]    |

Composite endpoint: any of the following death, bleeding event, or thromboembolic event. Model 1: adjusted for age and sex. Model 2: adjusted for age, sex, educational degree, GFR, number of antithrombotic drugs taken, HAS BLED Score, CHA2DS2 VASc Score, number of patients enrolled per study center, and time in study. Model 3: adjusted for age, sex, educational degree, GFR, number of antithrombotic drugs taken, HAS BLED Score, CHA2DS2 VASc Score, number of patients enrolled per study center, time in study, CYP2C9, CYP2C19, and VKORC1 phenotypes. \*Time in study was not used as a parameter for the outcome death. Significant findings in bold text.

**Table S5.** Sensitivity analyses for the composite endpoint comparing individualized risk assessment group with the standardized risk assessment group including only patients with the intake of vitamin-K-antagonists in the per protocol cohort (*n* = 167).

| Parameters included in models  | OR [95% CI] Model 1 | OR [95% CI] Model 2 | OR [95% CI] Model 3 |
|--------------------------------|---------------------|---------------------|---------------------|
| Individualized risk assessment | 1.75 [0.89–3.46]    | 1.89 [0.93–3.84]    | 1.85 [0.90–3.79]    |
| Age (years)                    | 1.07 [1.01–1.12]    | 1.05 [0.98–1.12]    | 1.05 [0.99–1.12]    |
| Sex (female)                   | 1.90 [0.95–3.80]    | 2.11 [0.93–4.78]    | 2.21 [0.94–5.17]    |
| Educational degree             | -                   | 1.08 [0.85–1.37]    | 1.07 [0.85–1.36]    |

|                                             |   |                  |                  |
|---------------------------------------------|---|------------------|------------------|
| GFR (mL/min/1.73m <sup>2</sup> )            | - | 0.99 [0.97–1.01] | 0.99 [0.97–1.01] |
| Antithrombotic drugs taken (number)         | - | 1.58 [0.82–3.05] | 1.64 [0.84–3.21] |
| HAS BLED (score)                            | - | 1.00 [0.68–1.47] | 0.96 [0.65–1.43] |
| CHA2DS2 VASc (score)                        | - | 1.08 [0.79–1.49] | 1.05 [0.76–1.46] |
| Amount of patients enrolled in study center | - | 0.93 [0.76–1.13] | 0.92 [0.75–1.12] |
| Time in study (days)                        | - | 1.00 [0.99–1.01] | 1.00 [0.99–1.01] |
| CYP2C9 phenotype (IM/ PM)                   | - | -                | 0.79 [0.36–1.70] |
| CYP2C19 phenotype (IM/PM)                   | - | -                | 0.71 [0.31–1.60] |
| VKORC1 phenotype (reduced)                  | - | -                | 1.96 [0.58–6.68] |

Composite endpoint: any of the following death, bleeding event, or thromboembolic event. Model 1: adjusted for age, and sex. Model 2: adjusted for sex, educational degree, GFR (glomerular filtration rate), number of antithrombotic drugs taken (excluding vitamin-K-antagonists), HAS BLED score, CHA2DS2 VASc score, number of patients enrolled per study center, and time in study. Model 3: adjusted for age, sex, educational degree, GFR (glomerular filtration rate), number of antithrombotic drugs taken (excluding vitamin-K-antagonists), HAS BLED score, CHA2DS2 VASc score, number of patients enrolled per study center, time in study, CYP2C9, CYP2C19, and VKORC1 phenotypes. Significant findings in bold text.

**Table S6.** Secondary analyses for the composite endpoint comparing individualized risk assessment group with the standardized risk assessment group including only patients with the intake of direct oral anticoagulants (*n* = 101) in the intention to treat (ITT, *N* = 101) and the per protocol (PP, *N* = 77) cohort.

| Parameters included in models               | OR [95% CI]<br>Model 1 <sup>ITT</sup> | OR [95% CI]<br>Model 1 <sup>PP</sup> | OR [95% CI]<br>Model 2 <sup>ITT</sup> | OR [95% CI]<br>Model 2 <sup>PP</sup> | OR [95% CI]<br>Model 3 <sup>ITT</sup> | OR [95% CI]<br>Model 3 <sup>PP</sup> |
|---------------------------------------------|---------------------------------------|--------------------------------------|---------------------------------------|--------------------------------------|---------------------------------------|--------------------------------------|
| Individualized risk assessment              | 1.54 [0.67–3.51]                      | 0.96 [0.38–2.44]                     | 1.42 [0.60–3.35]                      | 0.92 [0.34–2.46]                     | 1.52 [0.63–3.69]                      | 0.94 [0.34–2.58]                     |
| Age (years)                                 | 1.02 [0.96–1.08]                      | 1.04 [0.97–1.11]                     | 1.02 [0.95–1.09]                      | 1.06 [0.98–1.15]                     | 1.01 [0.94–1.09]                      | 1.06 [0.97–1.15]                     |
| Sex (female)                                | 1.39 [0.59–3.30]                      | 1.34 [0.49–3.64]                     | 1.83 [0.68–4.95]                      | 1.89 [0.58–6.11]                     | 2.05 [0.74–5.72]                      | 2.00 [0.60–6.65]                     |
| Educational degree                          | -                                     | -                                    | 1.06 [0.78–1.44]                      | 1.07 [0.75–1.53]                     | 1.07 [0.79–1.48]                      | 1.01 [0.75–1.62]                     |
| GFR (mL/min/1.73m <sup>2</sup> )            | -                                     | -                                    | 0.99 [0.97–1.02]                      | 1.01 [0.98–1.04]                     | 0.99 [0.97–1.02]                      | 1.01 [0.98–1.04]                     |
| Antithrombotic drugs taken (number)         | -                                     | -                                    | 0.96 [0.46–2.01]                      | 1.15 [0.43–3.05]                     | 0.98 [0.46–2.09]                      | 1.19 [0.44–3.20]                     |
| HAS BLED (score)                            | -                                     | -                                    | 1.51 [0.84–2.74]                      | 1.30 [0.65–2.60]                     | 1.40 [0.74–2.63]                      | 1.16 [0.56–2.44]                     |
| CHA2DS2 VASc (score)                        | -                                     | -                                    | 0.91 [0.66–1.26]                      | 0.86 [0.59–1.23]                     | 0.94 [0.67–1.32]                      | 0.88 [0.60–1.30]                     |
| Amount of patients enrolled in study center | -                                     | -                                    | 0.86 [0.68–1.10]                      | 0.94 [0.70–1.25]                     | 0.86 [0.67–1.12]                      | 0.92 [0.69–1.24]                     |
| Time in study (days)                        | -                                     | -                                    | 1.01 [1.00–1.01]                      | 0.99 [0.98–1.01]                     | 1.00 [1.00–1.01]                      | 0.99 [0.97–1.01]                     |
| CYP2C9 phenotype (IM/ PM)                   | -                                     | -                                    | -                                     | -                                    | 0.74 [0.27–2.01]                      | 0.66 [0.21–2.14]                     |
| CYP2C19 phenotype (IM/PM)                   | -                                     | -                                    | -                                     | -                                    | 1.60 [0.66–3.85]                      | 0.87 [0.30–2.50]                     |

|                                  |   |   |   |   |                  |                       |
|----------------------------------|---|---|---|---|------------------|-----------------------|
| VKORC1<br>phenotype<br>(reduced) | - | - | - | - | 1.54 [0.33–7.23] | 1.66 [0.22–<br>12.46] |
|----------------------------------|---|---|---|---|------------------|-----------------------|

---

Composite endpoint: any of the following death, bleeding event, or thromboembolic event. Model 1: adjusted for age, and sex. Model 2: adjusted for age, sex, educational degree, GFR (glomerular filtration rate), number of antithrombotic drugs taken (excluding directly acting oral anticoagulants), HAS BLED score, CHA2DS2 VASc score, number of patients enrolled per study center, and time in study. Model 3: adjusted for age, sex, educational degree, GFR (glomerular filtration rate), number of antithrombotic drugs taken (excluding vitamin-K-antagonists), HAS BLED score, CHA2DS2 VASc score, number of patients enrolled per study center, time in study, CYP2C9, CYP2C19, and VKORC1 phenotypes.
